# Supplementary material for: Quinone tailored selective oxidation of methane over palladium catalyst with molecular oxygen as an oxidant
Source: Royal Society of Chemistry journal article supplement (doi:10.1039/b915412d), 2009-01-01
Supplement: b915412d.pdf [file b915412d.pdf]

## **Electronic Supplementary Information (ESI)**

### **Quinone tailored selective oxidation of methane over palladium catalyst with molecular oxygen as an oxidant**

Yafang Fan,<sup>†</sup> Zengjian An,<sup>†</sup> Xiulian Pan,<sup>\*</sup> Xiumei Liu, and Xinhe Bao<sup>\*</sup>

*State Key Laboratory of Catalysis, Dalian Institute of Chemical Physics, Chinese Academy of Sciences,*

*Dalian 116023, China*

#### **SI-1: Activated carbon purification**

Activated carbon (sieved into <100 mesh) was purchased from Tianjin Kermal Chemical Reagent Company. It was purified in 1 M HNO<sub>3</sub> at room temperature for 12 h, followed by filtration and washing with deionized water till the filtrate was neutral. Then it was dried at 100 °C overnight. Subsequently it was further treated in 1 M HCl and the same washing and drying procedure were carried out. Thus treated activated carbon was used as support to prepare Pd/C.

#### **SI-2: Catalyst preparation and characterization**

Pd/C was prepared by impregnation. The nominal loading of palladium was 1 wt. %. The sample was dried at 60 °C for 12 h, followed by reduction in H<sub>2</sub> at 400 °C for 10 h. Transmission electron microscopy (TEM) was used to characterize the morphology of the catalysts before and after reaction, which was carried out on a FEI Tecnai G2 microscope operated at an accelerating voltage of 120 kV.

#### **SI-3: Catalytic reaction test**

The reaction was carried out in an autoclave made of titanium-nickel alloy with a glass-liner. The standard reaction conditions were: 0.01 g Pd/C, 100 μmol TCQ, 3 ml

---

<sup>†</sup> Y. Fan and Z. An made the same contribution to this paper.

CF<sub>3</sub>COOH, 1 ml H<sub>2</sub>O, 2.5 MPa CH<sub>4</sub> (with 10% N<sub>2</sub>), 1.0 MPa CO, 0.5 MPa O<sub>2</sub>, 140 °C and 3 h unless otherwise stated. GC-MS (Agilent 6890-5973N) and NMR (Bruker DRX-400) was used to analyze the products. The quantity of CF<sub>3</sub>COOCH<sub>3</sub> was obtained by GC analysis. After removal of solid by centrifugation and distillation, the liquid product was analyzed by <sup>1</sup>H NMR to determine the yield of HCOOH. A known amount of CH<sub>3</sub>CN was added to the reaction solution as an internal standard and a capillary tube containing 60 μl of D<sub>2</sub>O was used as an external lock and reference. The amount of H<sub>2</sub>O<sub>2</sub> generated in-situ was determined by titration with a standard solution of KMnO<sub>4</sub>. The concentration of Pd<sup>2+</sup> was determined by inductively coupled plasma atomic emission spectrometry (ICP-AES, TJA IRIS Advantage).

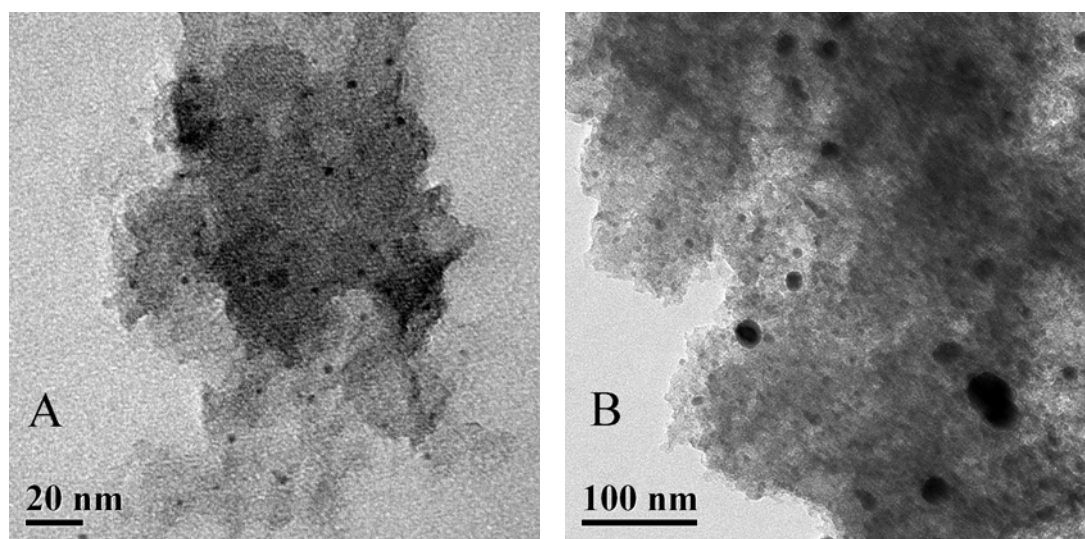

**Figure S1.** TEM images of the fresh (A) and used (B) Pd/C catalyst. The average size of Pd particles in the fresh catalyst is  $3.1 \pm 0.5$  nm and it grows to  $15.0 \pm 4.4$  nm after reaction.
